# Supplementary material for: Assessment of the Safety of Glucocorticoid Regimens in Combination With Abiraterone Acetate for Metastatic Castration-Resistant Prostate Cancer: A Randomized, Open-label Phase 2 Study
Source: PubMed Central journal article supplement (PMC6604092; doi:10.1001/jamaoncol.2019.1011), 2019-06-27
Supplement: jamaoncol-5-1159-s003.pdf [file jamaoncol-5-1159-s003.pdf]

## Data Sharing Statement

Attard. Assessment of the Safety of Glucocorticoid Regimens in Combination With Abiraterone Acetate. *JAMA Oncol*. Published August 08, 2019. 10.1001/jamaoncol.2019.1011

### Data

**Data available:** Yes

**Data types:** Deidentified participant data

**How to access data:** <http://yoda.yale.edu>

**When available:** With publication

### Supporting Documents

**Document types:** None

### Additional Information

**Who can access the data:** researchers whose proposed use of the data has been approved

**Types of analyses:** for any research purpose

**Mechanisms of data availability:** after approval of a proposal

**Any additional restrictions:** cannot be used in pursuit of litigation or for commercial interests
